# Supplementary material for: Actin-dependence of the chloroplast cold positioning response in the liverwort Marchantia polymorpha L
Source: PeerJ. 2016 Sep 28;4:e2513. doi: 10.7717/peerj.2513 (PMC5045877; doi:10.7717/peerj.2513)
Supplement: Data S1 [file peerj-04-2513-s001.xlsx]

## Sheet: Figure1c
Et 22℃
	Sample1			Sample2			Sample3			Sample4			Sample5
	Anticlinal	Periclinal	Back ground	Anticlinal	Periclinal	Back ground	Anticlinal	Periclinal	Back ground	Anticlinal	Periclinal	Back ground	Anticlinal	Periclinal	Back ground
	94.85	68	0	92.26	38	0	68.8	65	0	123.3	119	0	99.36	103	0
	90.77	64	0	90.34	58	1	86.17	33	0	129.9	97	1	95.2	86	0
	80.43	81	0	88.87	82	5	81.12	66	0	137.91	96	0	101.77	84	0
	83.02	74	1	94.93	69	2	71.33	55	0	101.76	100	0	99.21	87	0
	77.82	75	1	98.65	63	0	60.51	52	0	129.7	114	0	101.45	76	0
	109.83	50		93.38	91		65.22	62		119.43	126		101.08	74
	100.44	62		81.71	90		76.78	70		137.95	109		92.65	84
	110.87	44		97.93	76		72.61	49		129.58	122		104.74	84
	101.61	47		95.46	103		56.51	57		126.23	113		104.93	76
	98.3	83		97.19	74		68.03	70		146.9	113		97.49	101
	96.61	67		69.21	78		69.57	48		148.22	120		100.34	107
	100.47	73		85.12	81		62.65	72		139.24	117		111.92	91
	65.37	64		82.94	68		75.08	63		130.73	91		107.78	59
	92.92	42		91	70		73.14	53		125.88	107		93.97	72
	90	67		86.35	44		68.46	64		125.7	110		122.64	63
	107.18	64		82.46	59		77.48	66		131.87	86		100	78
	100.06	59		83.84	82		83.06	41		140.49	78		99.48	67
	101.59	72		77.71	77		67.77	56		141	114		115.1	108
	95.68	87		86.13	53		76.64	49		118.43	132		104.47	112
	95.21	95		95.78	74		78.52	70		129.83	113		98.29	89
	96.02	107		101.06	68		71.49	65		137.28	114		100.99	85
	86.02	85		93.07	97		81.52	73		131.23	113		108.07	70
	82.67	70		101.72	73		71.43	52		127.62	111		108.64	78
	72.06	93		81.57	60		73.61	47		145.56	89		97.83	91
	100.05	105		102.53	75		80.07	53		119.55	99		117.41	70
	100.05	90		93.96	50		69.67	66		125.96	120		103.29	85
	100.87	85		86.82	87		66.4	56		137.59	98		91	98
	83.89	89		102.27	52		56.28	43		125.24	111		88.19	89
	83	96		91.27	57		77.12	56		136.18	106		85.91	72
	83	95		63.7	78		73.9	50		129.11	106		113.01	50
Average	92.6887	75.1	0.4	89.641	70.9	1.6	72.0313	57.4	0	130.979	108.133	0.2	102.207	82.9667	0
Ave - Back	92.2887	74.7		88.041	69.3		72.0313	57.4		130.779	107.933		102.207	82.9667
P/A ratio	1.23546			1.27043			1.2549			1.21166			1.2319
Et 5℃
	Sample1			Sample2			Sample3			Sample4			Sample5
	Anticlinal	Periclinal	Back ground	Anticlinal	Periclinal	Back ground	Anticlinal	Periclinal	Back ground	Anticlinal	Periclinal	Back ground	Anticlinal	Periclinal	Back ground
	35.04	60	0	8.56	101	0	37.64	97	0	26.18	69	0	26.99	105	0
	49.06	70	0	5.12	28	0	9.57	78	0	38.39	102	2	8.81	67	0
	34.72	99	0	9.33	54	4	5.42	99	0	44.67	86	0	44.37	64	3
	59.93	96	9	8.44	83	0	8.38	100	0	10.09	43	0	40.72	51	0
	50.98	92	9	7.36	95	0	3.16	110	0	23	88	0	39.94	86	1
	32.66	88		65.16	98		14.12	73		41.76	84		63	95
	25.59	89		17.69	51		2.29	87		20.03	81		83.82	76
	38.41	68		35.2	43		18.09	48		36.19	78		13.48	99
	12.57	55		5.08	71		12.44	93		45.5	68		16.29	97
	41.27	55		4.06	90		27.49	88		32.14	89		27.18	97
	21.61	50		18	52		5.83	42		43.57	66		21.5	70
	25.76	41		12.01	44		4.65	111		42.74	84		11.05	71
	66.08	49		17.32	53		11.46	128		54.66	58		16.98	73
	15.89	86		12.47	50		10.35	88		50.09	73		13.63	48
	58.92	80		5.03	73		13.14	89		38.25	84		39.45	99
	41.51	62		4.65	73		10.84	89		39.42	72		33.8	100
	30.26	62		19.85	54		10.14	99		43.18	52		75.34	85
	20.27	108		16.24	81		16.81	91		34.52	81		32.11	83
	20.38	86		32.59	89		19.69	101		35.69	74		7.3	84
	29.15	82		10.64	78		52.84	140		20.09	81		10.34	89
	22.14	67		24.73	66		12.7	109		65.34	110		14.73	104
	30.81	80		29.54	97		6.88	110		56.14	94		29.03	91
	40.94	81		9.26	75		8.12	56		54.75	66		27.01	100
	70.14	66		13.91	99		5.42	111		60.83	83		43.02	60
	40.78	71		16.91	122		9.71	89		27.43	75		37.31	105
	31.63	52		18.52	111		8.5	116		12.36	78		59.37	115
	17.45	82		25.19	57		14.33	101		48.72	90		74.58	93
	68.77	100		71.67	87		9.5	43		21.65	88		35.42	100
	16.23	67		42.22	113		4.31	80		20.68	46		33.99	70
	13.44	103		10.47	76		5.7	108		17.58	91		24.31	110
Average	35.413	74.9	3.6	19.2407	75.4667	0.8	12.6507	92.4667	0	36.8547	77.8	0.4	33.4957	86.2333	0.8
Ave - Back	31.813	71.3		18.4407	74.6667		12.6507	92.4667		36.4547	77.4		32.6957	85.4333
P/A ratio	0.446185			0.246973			0.136813			0.470991			0.382704
Lat + Et 22℃
	Sample1			Sample2			Sample3			Sample4			Sample5
	Anticlinal	Periclinal	Back ground	Anticlinal	Periclinal	Back ground	Anticlinal	Periclinal	Back ground	Anticlinal	Periclinal	Back ground	Anticlinal	Periclinal	Back ground
	137.33	97	5	137.45	113	1	149.32	121	0	133.67	132	7	147.71	101	0
	120.86	110	6	124.94	109	1	145.8	132	0	128.87	110	8	145.64	124	1
	113.9	85	3	135.5	125	1	160.55	146	0	138.41	112	0	151.8	99	0
	128.05	120	8	136.64	123	0	165.27	129	0	145.03	116	5	134.2	108	2
	104.82	107	0	131.31	121	1	154.8	155	0	137.27	137	7	137.44	102	0
	102.91	118		143.33	110		152.2	111		145.51	112		146.49	109
	143.91	109		144.88	115		152.93	130		132.03	110		149.24	123
	143.68	110		139.44	120		146.7	112		139.5	126		141.52	102
	152.16	135		129.57	123		149.59	125		143.5	103		148.46	128
	148.88	129		137.93	110		146.61	120		142.67	141		135.21	122
	141.69	128		136.82	116		136.1	113		137.45	117		148.66	123
	142.92	141		136.82	124		139.37	130		144.7	101		142	135
	150.15	113		149.13	123		135.86	120		126.45	122		146.66	113
	130.68	95		146.49	125		146.77	117		136.21	122		132.59	84
	134.25	144		136.45	113		146.23	132		135.86	100		128.51	132
	126.65	99		137.51	129		142.74	114		133.46	107		144.25	145
	136.32	114		135.15	128		134.17	118		131.87	110		143.79	142
	135.37	144		145.43	128		149.82	130		122.21	112		135.24	122
	140.22	133		145.43	120		157.69	125		133.23	104		129.43	150
	137.55	116		137.94	120		150.18	130		129.06	144		130.56	140
	137.58	136		153.72	125		146.45	110		123.39	125		116.94	120
	122.81	130		137.7	129		159.59	133		129.81	112		120.7	128
	115.73	114		149	130		198.49	155		136.05	94		126.47	108
	134.84	106		158.79	129		142.06	145		136.7	98		118.77	132
	128.01	107		146.4	141		142.06	129		154.91	94		146.32	133
	151.23	104		142.68	120		129.15	123		121.3	94		135.24	138
	150.6	99		142	126		138.72	126		126.99	95		150.07	125
	137.87	115		148.02	115		129.91	120		143.71	118		145.74	94
	138.6	120		148.02	114		138.18	133		146.09	110		141.88	111
	132.13	110		140.11	112		131.67	127		142.27	134		148.98	127
Average	134.057	116.267	4.4	141.153	121.2	0.8	147.299	127.033	0	135.939	113.733	5.4	139.017	120.667	0.6
Ave - Back	129.657	111.867		140.353	120.4		147.299	127.033		130.539	108.333		138.417	120.067
P/A ratio	1.15903			1.16573			1.15953			1.20498			1.15283
Lat + Et 5℃
	Sample1			Sample2			Sample3			Sample4			Sample5
	Anticlinal	Periclinal	Back ground	Anticlinal	Periclinal	Back ground	Anticlinal	Periclinal	Back ground	Anticlinal	Periclinal	Back ground	Anticlinal	Periclinal	Back ground
	98.11	106	1	147.84	110	0	49.93	93	4	139.11	131	1	87.96	81	1
	82.57	112	0	117.5	136	4	56.8	73	1	136.03	134	3	92.86	80	3
	95.42	112	5	135.72	132	0	101.39	110	4	126.78	124	0	86.38	63	1
	90.14	98	1	138.64	113	0	77.88	58	0	134.26	120	5	94.48	69	0
	76.32	91	1	137.84	117	4	78.42	104	8	136.18	141	3	96.23	70	3
	96.09	103		140.3	101		84.85	79		120.55	131		95.14	81
	93.92	94		144.2	116		64.03	124		111.06	119		89.37	100
	90.49	89		127.4	107		79.46	95		115.67	121		90.4	93
	112.42	106		126.19	109		99.2	117		121.91	133		92.48	104
	87.48	111		135.04	105		91	112		121.66	110		105.16	96
	104.13	114		134.59	122		113.37	100		139.26	133		88.41	94
	97.43	99		137.37	111		69.75	101		132.68	124		95.24	93
	96.03	101		105.84	95		72.54	114		127.69	137		90.21	78
	85.17	110		92.32	107		103.75	123		147.66	134		68.71	74
	89.94	110		108.09	106		114.59	75		133.03	124		79.69	87
	78.62	101		114.96	104		114.61	108		142.73	142		106.93	88
	102.79	107		131.45	108		107.72	76		132.28	106		102.36	96
	94.05	101		130.56	109		75.55	137		143.74	109		97.77	75
	105.77	106		135.84	107		104.95	121		145.77	125		101.66	85
	97.05	93		134.09	66		96.11	126		149.28	121		96.25	45
	88.86	106		135.11	105		94.55	129		139.86	147		95.41	71
	82.64	93		79.02	107		79.42	133		151.77	122		93.18	62
	92.31	84		100.92	93		102.56	114		142.53	114		99.65	77
	90.18	117		102.84	94		77.09	102		146.03	130		92.17	70
	104.01	82		136.13	141		95.93	102		150.84	131		73.82	72
	86.29	115		131.68	139		108.8	123		150.41	123		96.39	94
	75.06	105		132.67	114		99.02	95		137.59	114		106.04	85
	93.62	102		132.92	79		109.9	87		131.63	115		99.6	96
	85.34	99		136.06	95		82.59	105		146.56	128		95.75	75
	84.19	118		143.02	127		97.76	100		132.56	138		86.28	82
Average	91.8813	102.833	1.6	126.872	109.167	1.6	90.1173	104.533	3.4	136.237	126.033	2.4	93.1993	81.2	1.6
Ave - Back	90.2813	101.233		125.272	107.567		86.7173	101.133		133.837	123.633		91.5993	79.6
P/A ratio	0.891814			1.1646			0.857456			1.08253			1.15075
DMSO 22℃
	Sample1			Sample2			Sample3			Sample4			Sample5
	Anticlinal	Periclinal	Back ground	Anticlinal	Periclinal	Back ground	Anticlinal	Periclinal	Back ground	Anticlinal	Periclinal	Back ground	Anticlinal	Periclinal	Back ground
	151.4	130	1	157.98	135	0	144.32	132	0	154.71	150	1	156.64	167	3
	138.05	116	12	162.8	131	0	156.04	140	5	151.26	148	3	160.03	161	0
	132.72	111	2	161.77	141	3	156.43	130	3	162.99	141	4	146.37	155	4
	144.77	127	4	146.81	162	0	150.15	102	0	155	130	0	167.01	150	1
	138.8	116	1	159.57	123	2	149.08	139	2	168.59	157	0	168.01	138	2
	146.87	121		153.65	136		154.79	129		149.49	156		163.45	153
	151.48	118		149.12	140		147.92	130		171.34	139		173.33	145
	141.99	105		160.63	125		152.91	135		170.45	131		174.57	138
	134.68	132		161.85	130		160.3	131		164.67	150		165.14	153
	152.91	126		157.59	116		159.88	108		160.86	159		164.96	161
	127.02	118		157.68	129		159.76	129		143.59	134		165.03	136
	146.43	138		169.06	127		154.54	129		166.03	131		170.82	143
	138.41	135		156.09	126		156.68	156		167.51	105		166.75	151
	150.65	125		166.17	149		148.02	143		156.9	147		161.75	127
	143.23	113		162.51	128		153.54	113		155.63	120		162.52	140
	144.84	127		154.06	137		148.84	141		148.74	148		153.39	130
	134.61	128		165.41	136		160.29	125		157.66	125		168.55	142
	137.47	124		160.27	135		155.22	147		156.62	127		173.69	152
	144.02	129		155.05	141		140.17	123		152.47	145		168.01	135
	163	148		158.93	137		161.01	153		162.46	151		146.76	143
	152.92	129		144.5	116		142	142		144.09	138		172.5	147
	140.02	120		150.27	120		120.29	144		168.28	145		194.23	149
	131.41	104		146.42	139		144.12	113		162.97	146		146.19	155
	147.68	128		145.31	131		140.45	130		156.38	134		148.57	149
	134.43	116		143.95	136		156.64	127		162.22	144		146.3	144
	136.77	108		146.28	134		162.17	131		160.17	134		171.97	156
	132.82	117		136.7	130		164.6	132		170.96	131		175.55	157
	132.9	116		152.92	134		159.85	117		156.63	124		166.73	145
	118.95	108		147.82	130		159.53	121		167.77	121		152.94	146
	136.85	100		155.06	135		141.59	143		160.24	124		164.86	134
Average	140.937	121.1	4	154.874	132.967	1	152.038	131.167	2	159.556	137.833	1.6	163.887	146.733	2
Ave - Back	136.937	117.1		153.874	131.967		150.038	129.167		157.956	136.233		161.887	144.733
P/A ratio	1.1694			1.16601			1.16158			1.15945			1.11852
DMSO 5℃
	Sample1			Sample2			Sample3			Sample4			Sample5
	Anticlinal	Periclinal	Back ground	Anticlinal	Periclinal	Back ground	Anticlinal	Periclinal	Back ground	Anticlinal	Periclinal	Back ground	Anticlinal	Periclinal	Back ground
	13.49	148	2	20.72	132	1	21.05	127	5	34.34	135	3	80.13	144	5
	15.93	108	2	41.18	157	1	21.01	141	4	36.41	160	3	20.14	120	5
	28.2	108	0	23.43	119	2	18.48	154	2	46.47	84	0	16.43	166	4
	36.26	108	3	38	179	0	15.79	170	1	67.18	76	1	52.84	112	3
	40.47	120	3	70.23	149	2	12.53	161	4	22.94	151	3	21.58	131	5
	43.15	110		33.5	85		13.26	168		18.64	120		27.2	75
	23.93	119		36.49	87		15.21	105		21.88	150		45.28	116
	21.52	111		38.75	54		18.25	90		85.27	100		38.54	105
	23.17	132		34.09	86		16.4	128		35.64	79		26.67	97
	44.6	103		26.25	94		52.02	114		53.88	129		72.87	134
	28.3	115		32.8	135		18.03	118		32.82	105		33.38	121
	20.68	124		19	178		20.53	145		53.38	147		31.45	99
	44.39	108		15.05	168		20.03	152		29.52	78		80.36	148
	21.35	138		24.8	128		26.76	107		71.05	109		58.69	147
	24.35	95		29.23	88		13.46	123		60.27	172		70.77	122
	15.62	48		25.55	116		14.23	154		96.5	154		23.61	97
	19.43	118		22.65	143		9.82	130		39.59	122		24.34	82
	10.36	82		53.58	103		11.79	74		80.05	120		18.68	76
	16.93	107		21.98	147		14.97	36		48.6	103		42.62	111
	12.92	127		14.48	169		13.46	104		59.86	122		25.04	105
	56.43	57		27.75	133		10.88	155		18.06	148		19.69	163
	88.4	105		21.52	145		37.84	144		47.49	135		20.74	144
	25.42	71		20.5	176		40.18	124		59.67	110		17.69	139
	17.78	134		21.78	132		58.37	102		34.63	139		22.08	109
	11.21	145		22.23	155		75.62	134		34.22	147		69.97	105
	13.95	132		28.52	146		97.62	137		24.09	117		23.59	97
	38.64	144		70.46	175		62.85	60		40.77	133		40.84	124
	13.69	103		42.6	67		81.51	144		61.39	146		78.49	88
	22.56	119		43.28	183		85.41	159		59.88	149		85.04	108
	20.72	144		41.89	167		42.52	75		39.48	124		62.25	152
Average	27.1283	112.767	2	32.0763	133.2	1.2	31.996	124.5	3.2	47.1323	125.467	2	41.7	117.9	4.4
Ave - Back	25.1283	110.767		30.8763	132		28.796	121.3		45.1323	123.467		37.3	113.5
P/A ratio	0.226858			0.233912			0.237395			0.365543			0.328634
Cyto + DMSO 22℃
	Sample1			Sample2			Sample3			Sample4			Sample5
	Anticlinal	Periclinal	Back ground	Anticlinal	Periclinal	Back ground	Anticlinal	Periclinal	Back ground	Anticlinal	Periclinal	Back ground	Anticlinal	Periclinal	Back ground
	139.7	107	2	179.34	134	0	151.92	133	12	148.31	107	2	145.59	140	3
	138.39	125	2	164.28	157	2	161.16	127	12	163.29	124	0	148.49	133	4
	139.01	140	5	180.89	184	6	146.91	107	14	147.17	133	2	145.7	144	0
	149.81	117	9	186.79	151	4	161.89	147	14	157.45	130	4	145.84	104	0
	151.41	129	0	178.51	165	0	166.58	128	20	166.72	141	11	150.85	127	0
	149.03	102		170.78	130		170.82	152		158.89	160		138.62	142
	154.17	157		161.32	162		178.11	145		173.26	138		147.74	127
	144.44	159		184.52	154		172.86	153		188.98	166		149.92	150
	147.25	123		172.01	163		177.85	155		172.74	141		145.7	131
	156.6	117		172.11	151		176.39	141		168.3	141		154.63	128
	154.93	90		177.67	162		193.17	179		172.33	177		158.25	157
	164.55	118		182.19	181		192.65	166		158.25	136		160.25	137
	149.57	117		194.68	151		187.72	169		157.39	131		155.02	117
	149.31	131		184.37	161		161.98	159		147.71	140		149.72	135
	155.02	138		189.33	195		194.73	145		146.99	134		162.28	109
	147.78	127		180.86	175		196.77	160		161.15	118		159.46	154
	154.4	163		180.65	188		187.97	152		152.36	152		150.02	139
	143.41	125		169.89	167		189.71	116		143.51	146		140.91	136
	152.15	139		192.61	192		197.68	118		122.21	151		149.27	138
	147.28	133		196.14	187		200.35	152		174.04	81		160.06	129
	146.45	144		193.78	174		202.91	151		150.64	145		150.93	133
	160.14	141		193.64	179		202.29	154		150.34	148		156.93	154
	158.36	152		191.02	175		196.41	129		131.56	175		151.86	142
	149.49	141		194.09	176		197.14	158		154.66	119		154.68	137
	141.07	145		196.53	159		194.69	163		177.9	147		146.91	143
	150.39	133		191.16	145		194.99	137		174.32	138		153.77	145
	152.86	149		192.67	166		189.67	159		159.64	131		159.44	153
	151.93	118		193.53	159		166.76	116		157.94	142		170.07	137
	157.17	125		191.44	140		162.51	145		157.76	147		152.48	134
	148.36	128		194.47	171		147.3	127		153.42	141		148.23	139
Average	150.148	131.1	3.6	184.376	165.133	2.4	180.73	144.767	14.4	158.308	139.333	3.8	152.121	136.467	1.4
Ave - Back	146.548	127.5		181.976	162.733		166.33	130.367		154.508	135.533		150.721	135.067
P/A ratio	1.14939			1.11824			1.27586			1.14			1.1159
Cyto + DMSO 5℃
	Sample1			Sample2			Sample3			Sample4			Sample5
	Anticlinal	Periclinal	Back ground	Anticlinal	Periclinal	Back ground	Anticlinal	Periclinal	Back ground	Anticlinal	Periclinal	Back ground	Anticlinal	Periclinal	Back ground
	163.71	157	0	118.18	137	1	108.34	91	3	108.73	62	1	126.78	111	0
	177.17	118	3	100.09	110	2	99.26	87	2	118.36	85	5	121.12	123	1
	150.86	138	0	95.59	91	5	109.41	76	1	114.36	94	0	149.79	138	1
	142.15	169	0	104.15	103	0	93.7	87	2	112.85	89	0	185.37	114	3
	177.57	172	0	135.73	114	0	96.83	87	2	113.76	86	4	151.56	94	1
	187.79	158		144.25	79		99.81	107		116.57	123		147.65	138
	187.79	140		138.95	97		115.29	92		112.91	85		139.43	116
	187.79	162		101.31	96		95.06	89		103.34	106		136.24	130
	197.69	161		107.73	112		100.08	76		103.98	101		121.24	125
	181.03	174		119.16	84		118.98	84		107.03	79		161.19	105
	167.45	171		119.08	90		107.48	83		112.35	103		141.42	114
	164.84	175		103.92	85		100.5	99		116.02	94		129.41	135
	197.21	161		127.59	103		93.44	96		105.65	81		126.68	135
	175.03	169		137.13	120		92.34	86		118.42	93		143.42	122
	184.84	183		124.95	108		99.66	70		103.47	110		125.84	110
	163.42	148		106.95	105		102.48	107		114.5	90		128.12	148
	170.03	162		129.19	85		102.68	110		120.3	120		113.16	138
	182.21	154		145.23	125		99.02	124		119.81	115		125.68	135
	181.26	125		128.72	105		115.41	115		130.58	103		104.74	124
	190.75	144		142.67	92		113.49	122		118.86	99		137.88	142
	155.46	116		185.19	119		115.32	101		114.69	101		133.58	145
	159.95	122		136.82	108		117.03	74		114.53	104		134.66	128
	161.17	135		138.12	121		106.01	90		113.1	86		137.91	125
	155.54	146		110.23	107		104.88	58		104.54	83		142	110
	147.01	177		115.12	110		90.18	59		116.58	78		146.11	107
	133.41	148		122.09	121		95.32	74		121.44	106		138.45	112
	152.3	165		114.97	113		84.94	71		111.07	79		140.02	107
	170.08	181		126.38	104		86.8	91		114.24	100		134.13	139
	171.88	190		145.57	104		100.19	112		116.1	101		146.44	97
	190.5	190		135.42	115		105.69	101		113.9	73		152.12	126
Average	170.93	157.033	0.6	125.349	105.433	1.6	102.321	90.6333	2	113.735	94.3	2	137.405	123.1	1.2
Ave - Back	170.33	156.433		123.749	103.833		100.321	88.6333		111.735	92.3		136.205	121.9
P/A ratio	1.08883			1.19181			1.13186			1.21056			1.11735
P/A ratio
	Et		Lat + Et		DMSO		Cyto + DMSO
	22℃	5℃	22℃	5℃	22℃	5℃	22℃	5℃
Sample1	1.23546	0.446185	1.15903	0.891814	1.1694	0.226858	1.14939	1.08883
Sample2	1.27043	0.246973	1.16573	1.1646	1.16601	0.233912	1.11824	1.19181
Sample3	1.2549	0.136813	1.15953	0.857456	1.16158	0.237395	1.27586	1.13186
Sample4	1.21166	0.470991	1.20498	1.08253	1.15945	0.365543	1.14	1.21056
Sample5	1.2319	0.382704	1.15283	1.15075	1.11852	0.328634	1.1159	1.11735
Average	1.24087	0.336733	1.16842	1.02943	1.15499	0.278468	1.15988	1.14808
StdDv	0.022547	0.141548	0.0209396	0.14519	0.0207507	0.0640986	0.0663789	0.0513167

## Sheet: Figure2e
Ory + DMSO 22℃
	Sample1			Sample2			Sample3			Sample4			Sample5
	Anticlinal	Periclinal	Back ground	Anticlinal	Periclinal	Back ground	Anticlinal	Periclinal	Back ground	Anticlinal	Periclinal	Back ground	Anticlinal	Periclinal	Back ground
	73.22	60	0	64.63	60	0	91.06	53	0	82.28	55	0	79.75	38	0
	81.63	65	0	55.28	47	0	89.54	65	0	78.63	54	0	85.64	65	0
	87.17	96	0	69.89	60	0	87.93	53	0	70.8	68	0	79.71	58	0
	87.16	82	0	60.41	60	0	86.4	81	0	76.68	46	0	71.28	51	0
	86.4	79	0	61.32	58	0	76.01	70	0	53.52	52	0	77.59	53	0
	84.48	65		67.32	61		74.93	66		89.03	48		81.55	87
	88.75	82		67.94	66		83.46	64		65.02	42		76.94	62
	90.85	82		66.47	62		93.17	70		75.17	25		66.47	64
	90.22	79		66.54	58		81.16	71		65.49	89		69.36	62
	91.86	70		70.37	77		83.33	79		78.13	48		69.84	57
	101.06	86		67.1	53		83.87	92		83.09	65		76.23	65
	80.05	70		60.54	60		85.96	82		64.58	30		77.51	67
	94.84	79		72.92	58		82.62	77		86.91	57		84.87	49
	83.38	79		66.71	70		94.07	68		95.5	55		74.04	54
	100.68	95		67.02	49		84.89	69		51.68	46		64.28	68
	100.68	82		70.48	68		88.81	90		68.36	50		71.58	55
	72.93	95		69.98	73		81.75	67		93.24	70		70.06	34
	93.25	95		66.35	55		87.23	60		74.53	63		53.2	59
	91.42	87		67.63	57		75.69	69		81.78	75		63.58	42
	91.27	81		73.11	74		85.76	73		88.08	62		70.98	60
	88.33	69		68.78	65		93.94	75		90.25	56		65.03	63
	92.24	81		68.05	59		77.42	79		92.62	58		63.99	63
	102.56	94		72.95	64		73.96	72		78.55	80		58.7	60
	89.32	66		70.06	65		79.81	75		105.23	50		67.87	53
	93.94	78		65.98	67		103.48	90		86.07	72		71.97	62
	91.82	87		59.46	55		98.08	72		92.03	71		65.27	42
	90.87	67		57.33	68		84.09	88		80.1	33		67.2	67
	89.95	67		64.64	75		83.88	80		92.86	56		60.72	67
	99.38	68		72.08	75		100.11	70		76.47	36		80.11	79
	99.21	100		66.86	65		91.37	73		95.04	46		79.59	66
Average	90.2973	79.5333	0	66.6067	62.8	0	86.126	73.1	0	80.3907	55.2667	0	71.497	59.0667	0
Ave - Back	90.2973	79.5333		66.6067	62.8		86.126	73.1		80.3907	55.2667		71.497	59.0667
P/A ratio	1.13534			1.06062			1.17819			1.4546			1.21045
Ory + DMSO 5℃
	Sample1			Sample2			Sample3			Sample4			Sample5
	Anticlinal	Periclinal	Back ground	Anticlinal	Periclinal	Back ground	Anticlinal	Periclinal	Back ground	Anticlinal	Periclinal	Back ground	Anticlinal	Periclinal	Back ground
	43.74	77	0	0.27	70	0	2.63	96	0	4.72	81	0	0.57	58	0
	28.42	83	0	0.93	50	0	7.85	67	0	5.14	83	0	21.3	79	0
	1.51	76	3	4.86	62	0	1.7	78	0	14.6	53	0	18.23	70	0
	18.12	60	0	15.35	69	0	35.39	104	0	4.87	69	0	63.81	60	0
	42.86	63	0	14.46	62	0	0.34	38	0	39.32	62	0	38.89	59	0
	25.22	72		9.4	69		9.95	78		39.91	87		20.4	81
	42.57	50		35.53	79		7.46	74		1.97	60		57.05	78
	28.47	58		36.28	56		24.72	82		7.18	73		17.1	77
	40.1	60		0.67	46		9.76	84		2.41	76		23.35	68
	34.47	55		4.94	76		40.86	69		1.14	75		43.08	62
	28.7	58		43.89	81		54.26	95		0.7	74		69.1	63
	6.55	44		29.13	68		57.97	62		7.61	49		0.07	81
	64.19	68		4.46	88		72.57	51		34.66	62		52.05	69
	31.23	60		2.14	78		25.05	77		4.38	60		74.12	67
	59.07	65		12.75	95		5.82	110		0.47	86		61.21	55
	38.43	44		1.63	79		13.84	87		1.62	75		47.25	47
	41.81	62		31.93	91		31.2	102		0.08	42		35.95	55
	50.47	72		29.42	66		8.98	114		4.18	81		23.85	70
	47.92	49		19.65	79		2.82	90		13.91	88		24.68	74
	22.45	52		22.82	60		2.01	102		8.96	70		21.22	81
	23.78	50		19.41	66		24.5	94		0.65	44		72.34	61
	45.19	46		30.16	97		1.64	96		6.2	53		81.22	87
	28.09	42		54.59	93		0.4	125		2.58	80		93.95	60
	41.94	89		4.03	90		0.14	107		7.84	74		79.45	79
	28.69	80		25.79	112		28.65	86		3.13	76		38.42	97
	46.43	50		65	77		14.2	117		11.06	69		80.68	60
	30.07	61		74.51	91		27.75	104		42.82	72		53.44	92
	16.02	70		34.03	83		0.63	102		46.6	82		56.15	106
	13.3	55		15.57	75		9.48	85		2.33	57		60.93	92
	36.17	48		37.33	95		11.15	97		11.71	65		1.66	60
Average	33.5327	60.6333	0.6	22.6977	76.7667	0	17.7907	89.1	0	11.0917	69.2667	0	44.384	71.6	0
Ave - Back	32.9327	60.0333		22.6977	76.7667		17.7907	89.1		11.0917	69.2667		44.384	71.6
P/A ratio	0.548573			0.295671			0.199671			0.16013			0.619888
P/A ratio
	Oly + DMSO
	22℃	5℃
Sample1	1.13534	0.548573
Sample2	1.06062	0.295671
Sample3	1.17819	0.199671
Sample4	1.4546	0.16013
Sample5	1.21045	0.619888
Average	1.20784	0.364787
StdDv	0.148917	0.207833

## Sheet: Figure5c
Et (Dark)																	Et (wBL)
	Sample1			Sample2			Sample3			Sample4			Sample5					Sample1			Sample2			Sample3			Sample4			Sample5
	Anticlinal	Periclinal	Back ground	Anticlinal	Periclinal	Back ground	Anticlinal	Periclinal	Back ground	Anticlinal	Periclinal	Back ground	Anticlinal	Periclinal	Back ground			Anticlinal	Periclinal	Back ground	Anticlinal	Periclinal	Back ground	Anticlinal	Periclinal	Back ground	Anticlinal	Periclinal	Back ground	Anticlinal	Periclinal	Back ground
	9.25	139	0	17.1	100	0	29.24	126	1	37.16	107	0	14.79	82	0			142.99	132	10	69.15	42	3	117.31	120	1	82.68	79	5	99.07	77	4
	13.12	145	0	9.08	104	0	26.73	123	0	14.38	107	0	23.62	120	1			144.25	132	8	72.59	43	2	121.32	122	1	83.96	78	5	93.14	85	1
	26.56	119	0	10.25	111	0	32.49	104	2	16.66	120	2	8.56	95	0			141.99	126	8	82.17	43	3	123.16	104	1	103.96	83	5	98.11	112	4
	28.67	143	3	9.98	140	0	17.62	120	0	10.25	142	0	7.82	120	0			140.22	118	8	75.45	58	5	111.59	101	3	97.62	82	4	97.99	111	2
	23.81	149	4	19.68	90	0	30.04	124	0	7.83	105	0	6.53	118	0			148.16	139	8	73.26	57	2	122.23	118	2	100.44	76	4	85.08	94	4
	8.11	135		7.87	76		35.1	138		7.7	130		10.3	90				149.07	125		78.06	56		128.03	120		95.52	89		87.87	86
	13.48	128		9.31	114		23.87	100		18.8	125		18.64	69				145.21	125		85.99	88		120.51	120		86.65	78		90.4	84
	22.12	144		9.4	79		18.95	110		15.87	91		11.2	103				151.63	134		82.16	69		123.31	102		80.81	91		90.11	95
	28.7	171		4.39	99		9.5	166		12.09	140		8.63	113				150.37	96		93.44	55		120.29	104		85.9	71		96.07	99
	17.74	108		6.93	128		19.25	153		11.66	100		8.68	81				148.37	132		87.67	73		114.57	123		84.58	81		105.83	104
	14.52	132		8.05	78		20.76	138		14.11	117		17.95	104				142.91	125		87.7	68		117.97	112		87.63	77		102.71	99
	29.43	162		10.59	119		11.69	105		9.64	117		9.68	102				141.82	128		83.07	66		115.73	115		89.57	93		105.62	110
	23.27	141		5.35	112		9.23	109		26.58	110		9.52	110				134.06	126		77.29	63		119.76	114		80.44	91		99.64	104
	29.33	146		10.21	131		6.18	124		12.49	115		9.14	108				126.44	128		63.91	75		116.7	123		83.14	74		93.58	89
	16.5	113		10.32	68		9.21	103		12.83	115		6.29	102				138.58	114		67.1	68		114.31	93		72.13	81		91.84	96
	18.09	149		16.23	112		35.83	110		8.47	111		18.77	109				140	103		56.76	58		115.47	130		83	73		96.46	85
	16.19	141		17.68	61		8.05	102		6.74	132		8.46	107				152.74	127		64.53	55		114.31	123		83.55	80		106.38	114
	28.51	120		16.29	100		12.44	124		7.12	130		8.9	117				138.72	87		54.57	46		119.25	119		92.6	78		92.86	97
	28.68	147		16.07	85		35.29	112		19.43	120		7.28	106				145.35	140		69.2	64		116.27	132		83.32	89		97.11	67
	23.87	150		11.39	78		8.85	123		12.33	99		4.33	109				158.12	128		53.73	73		119.31	127		86.54	105		101.43	111
	17.02	129		8.1	114		8.96	135		12.93	120		6.5	140				153.77	125		50.46	59		103.78	125		84.7	91		99.38	96
	10.99	143		9.64	123		10.86	115		11.02	105		12.32	120				148.66	133		47.47	56		116.38	117		80.73	90		98.96	101
	21.68	142		26.17	116		11.74	125		20.45	123		22.9	127	0.133987			160.34	122		49.57	59		85.48	106		70.35	81		107.89	110
	14.2	132		16.33	115		8.62	135		15.88	114		10.15	92	0.113388			138.18	117		54.14	63		110.45	114		81.92	81		107.6	110
	14.87	129		6.9	96		11.44	116		9.82	100		7.88	95	0.138207			155.68	125		66.16	56		89.75	130		81.6	81		111.52	108
	20.93	122		14.42	100		15.16	125		7.5	114		17.32	107	0.121257			139.08	128		51.27	53		94.44	116		80.46	74		115.87	112
	10.61	144		7.03	112		10.36	114		8.27	115		9.07	86	0.10115			138.18	121		50.34	37		101.33	93		82.19	52		110.26	122
	28.04	105		15.46	86		11.15	143		30.42	117		5.26	56				141.66	103		54.26	68		92.05	126		85.39	87		107.97	95
	9.93	138		4.57	105		11.07	114		15.48	115		5.39	136				135.07	123		61.99	64		101.57	84		88.57	74		93.88	104
	17.5	134		9.91	88		20.98	119		16.67	108		4.19	87				133.33	123		62.55	63		108.14	91		78.31	78		97.35	106
Average	19.524	136.667	1.4	11.49	101.333	0	17.3553	121.833	0.6	14.3527	115.467	0.4	10.669	103.7	0.2		Average	144.165	122.833	8.4	67.5337	59.9333	3	112.492	114.133	1.6	85.2753	81.2667	4.6	99.3993	99.4333	3
Ave - Back	18.124	135.267		11.49	101.333		16.7553	121.233		13.9527	115.067		10.469	103.5			Ave - Back	135.765	114.433		64.5337	56.9333		110.892	112.533		80.6753	76.6667		96.3993	96.4333
P/A ratio	0.133987			0.113388			0.138207			0.121257			0.10115				P/A ratio	1.18641			1.1335			0.985418			1.05229			0.999647
Lat + Et (Dark)																	Lat + Et (wBL)
	Sample1			Sample2			Sample3			Sample4			Sample5					Sample1			Sample2			Sample3			Sample4			Sample5
	Anticlinal	Periclinal	Back ground	Anticlinal	Periclinal	Back ground	Anticlinal	Periclinal	Back ground	Anticlinal	Periclinal	Back ground	Anticlinal	Periclinal	Back ground			Anticlinal	Periclinal	Back ground	Anticlinal	Periclinal	Back ground	Anticlinal	Periclinal	Back ground	Anticlinal	Periclinal	Back ground	Anticlinal	Periclinal	Back ground
	7.83	133	0	6.79	125	2	6.52	136	2	9.72	117	2	16.93	90	0			26.39	121	1	17.97	118	0	12.92	71	1	9.45	95	0	15.06	117	5
	10.21	150	0	9.13	122	0	9.31	98	0	9.65	108	2	10.55	132	0			39.2	87	1	11.63	90	1	9.23	52	0	9.14	86	4	20.34	110	1
	14.02	82	0	6.96	115	0	8.25	117	4	7.95	138	0	20.77	118	0			23.26	113	3	21.59	100	1	10.42	67	5	13.35	88	2	27.26	111	0
	10.39	117	0	8.34	147	0	21.22	114	1	5.84	152	4	25.75	107	10			19.52	119	3	23.65	79	1	13.22	77	1	12.41	93	2	14.45	72	0
	7.31	121	0	20.42	147	3	18.43	122	0	11.07	128	1	10.32	117	0			19.52	97	1	17.82	102	1	20.58	47	2	9.63	82	1	27.22	112	1
	9.82	107		8.05	148		12.6	114		8.81	99		15.07	119				31.7	89		22.81	88		12.08	79		7.78	105		16	83
	12.79	137		22.92	108		27.12	127		5.36	134		17.49	127				24.99	106		17.02	97		23.53	80		10.95	73		22.05	117
	7.5	108		8.35	135		15.74	103		4.27	119		43.17	108				29.84	132		13.86	95		17.44	35		35.58	82		12.04	120
	8.03	123		13.82	127		10.13	73		5.71	97		19.36	117				18.63	95		14.11	122		17.65	62		11.73	78		14.34	112
	9.52	130		16.24	124		35.34	133		17.2	106		20.44	134				24.47	123		12.28	101		15.31	79		15.11	72		11.21	53
	8.83	111		15.57	113		6.45	108		8.12	127		13.74	131				11.55	128		14.53	79		16.69	62		11.04	72		11.88	111
	15.47	123		17.11	148		22.64	86		6.65	102		6.62	124				21.67	132		12.34	104		11.64	92		16.46	72		11.08	110
	8.24	66		18.27	139		9.84	133		9.79	127		11.55	111				13.72	104		20.89	97		20.11	74		14.59	103		14.82	120
	4.72	145		10.02	135		8.68	143		6.71	86		39.49	120				23.21	92		15.37	91		14.1	96		10.05	98		11.04	98
	27.44	121		12.85	134		19.34	133		6.14	118		14.94	106				28.18	124		14.73	101		21.09	98		9.54	95		14.1	103
	9.5	120		8.91	159		9.66	139		9.49	87		10.6	81				22.48	118		23.65	71		22.32	98		11.96	99		20.67	91
	7.25	114		9.78	132		8.58	122		9.8	103		14.25	99				21.64	141		23.58	74		13.26	95		9.51	74		11.83	114
	10.4	106		12.36	98		11.97	123		6.46	147		13.95	115				29.01	84		21.14	109		23.49	86		10.54	101		11.55	116
	4.24	121		26.47	139		5.32	112		10.5	130		21.88	91				16.03	133		11.8	96		20.36	86		10.33	121		12.56	101
	4.85	84		16.59	158		8.1	97		7.13	137		12.57	134				16.56	115		21.18	88		27.01	96		11.13	113		14.27	68
	8.31	126		12.25	103		6.32	99		9.07	103		7.18	115				18.14	106		13.77	60		10.14	93		16.18	117		10.62	102
	14.91	131		12.04	134		4.9	109		5.6	98		7.05	112				15.47	118		12.16	122		13.97	103		11.37	80		12.16	99
	8.49	116		15.86	128		6.35	105		7.3	111		14.63	95	0.0863872			23.41	115		10.2	102		16.94	114		13.04	100		12.19	114
	15.65	145		11.24	112		7.25	125		10.53	99		9.38	129	0.096626			32.26	88		11.3	95		20.04	82		11.84	95		11.78	99	0.178546
	11.74	140		9.99	122		4.88	122		7.73	108		9.92	113	0.0891212			24.94	152		14.07	87		13.53	104		16.17	108		11.72	92	0.170596
	11.78	112		14.47	109		10.72	115		10.2	122		14.85	125	0.0566753			15.82	128		15.72	93		19.15	95		19.38	107		15.52	90	0.18
	5.18	118		14.4	125		4.97	105		11.85	128		20.91	91	0.127009			16.76	127		20.62	86		22.14	95		12.98	102		16.19	107	0.122109
	11.66	99		17.82	130		11.67	134		9.66	122		20.79	134				21.53	118		22.43	76		21.35	110		24.89	108		24.91	115	0.136947
	7.65	157		16.67	141		6.25	108		7.28	122		14.59	121				15.4	134		16.8	76		9.49	104		10.71	117		18.81	101
	16.4	127		8.61	126		8.69	112		4.79	144		10.17	121				17.72	126		9.75	108		12.46	109		9.92	125		9.28	114
Average	10.3377	119.667	0	13.41	129.433	1	11.5747	115.567	1.4	8.346	117.3	1.8	16.297	114.567	2		Average	22.1007	115.5	1.8	16.6257	93.5667	0.8	16.722	84.7	1.8	13.2253	95.3667	1.8	15.2317	102.4	1.4
Ave - Back	10.3377	119.667		12.41	128.433		10.1747	114.167		6.546	115.5		14.297	112.567			Ave - Back	20.3007	113.7		15.8257	92.7667		14.922	82.9		11.4253	93.5667		13.8317	101
P/A ratio	0.0863872			0.096626			0.0891212			0.0566753			0.127009				P/A ratio	0.178546			0.170596			0.18			0.122109			0.136947
DMSO (Dark)																	DMSO (wBL)
	Sample1			Sample2			Sample3			Sample4			Sample5					Sample1			Sample2			Sample3			Sample4			Sample5
	Anticlinal	Periclinal	Back ground	Anticlinal	Periclinal	Back ground	Anticlinal	Periclinal	Back ground	Anticlinal	Periclinal	Back ground	Anticlinal	Periclinal	Back ground			Anticlinal	Periclinal	Back ground	Anticlinal	Periclinal	Back ground	Anticlinal	Periclinal	Back ground	Anticlinal	Periclinal	Back ground	Anticlinal	Periclinal	Back ground
	3.03	108	0	17.7	102	5	17.27	108	2	7.49	78	0	6.91	86	0			96.33	78	7	106.93	56	5	93.76	59	5	114.14	72	5	105.09	80	2
	9.63	94	0	5.55	156	0	16.66	107	1	17.82	95	2	19.25	71	2			93.76	99	4	119.19	84	7	109.1	44	3	109.61	97	7	109.37	94	0
	6.74	134	0	15.14	158	11	36.33	98	1	9.63	71	3	23.91	80	0			91.81	88	8	106.33	74	2	98.56	67	4	118.16	74	6	104.11	100	0
	11.85	107	0	22.85	86	0	22.47	65	0	13.77	80	0	16.08	108	0			85.58	80	10	113.6	77	4	101.95	78	5	113.29	79	5	103.57	92	0
	31.03	91	0	20.99	63	2	25.73	100	0	8.13	122	0	8.74	110	0			102.4	85	9	111.57	76	5	94.38	62	5	120.64	74	8	100.18	95	0
	5.78	110		5.62	83		7.34	94		19.31	100		9.16	101				91.69	71		101.53	90		90.86	94		108.72	75		106.68	93
	16.57	113		9.37	147		21.02	84		12.74	99		8.24	62				80.23	84		112.57	87		75.99	85		110.6	78		98.58	94
	13.1	110		5.08	144		38.38	104		7.49	80		16.4	60				81.02	81		116.52	67		99.09	85		111.24	79		106.55	106
	34.92	124		19.62	99		42.46	51		10.02	112		12.48	106				84.7	83		108.18	77		103.8	100		109.88	76		111.92	101
	5.51	53		14.89	109		13.91	66		3.09	82		5.82	100				89.25	79		116.57	90		113.55	96		110.78	78		120.42	89
	4.62	101		4.01	113		6.97	116		11.09	98		5.5	108				77.23	73		96.85	97		90.29	93		107.54	82		109.68	99
	5.96	123		3.98	133		5.78	109		15.63	121		8.78	112				84.49	63		105.25	96		92.06	89		109.11	80		115.38	107
	5.82	116		11.59	146		17.1	95		8.9	92		8.12	85				74.32	57		95.01	84		77.02	78		99.16	88		116.5	108
	4.87	35		15.38	95		29.25	77		12.91	98		7.57	80				82.52	78		105.01	104		95.44	77		105.79	71		112.9	90
	5.48	115		3.58	111		6.91	58		7.05	83		15.18	92				88.49	73		112.12	95		87.14	103		105.45	94		122.96	88
	4.14	77		21.38	163		11.49	104		17.25	98		3.35	58				87.29	75		105	91		91.66	78		96.71	85		109.19	106
	11.14	123		11.46	137		3.21	65		23.24	96		3.66	64				83.91	75		105.85	96		89.95	80		96.16	105		112.03	90
	7.49	130		17.26	68		3.65	97		7.15	74		4.13	75				87.66	75		108.64	74		86.28	78		119.14	97		110.85	84
	12.66	104		24.49	120		6.57	116		5.16	116		3.74	87				89.78	85		104.85	94		95.82	79		110.97	90		114.6	84
	3.15	103		20.06	119		7.09	73		3.17	91		2.56	41				90.87	89		114.52	92		107.59	73		105.9	83		103.03	77
	3.96	93		12.09	96		17.74	67		3.35	57		3.49	69				86.78	84		113.13	81		94.14	63		112.66	98		115.98	91
	26.37	126		3.42	114		4.16	115		23.01	78		25.44	95				93.97	85		106.32	71		98.2	89		107.76	84		105.77	87
	8.09	73		17.7	100		4.28	173		3.69	114		35.83	95	0.114708			88.64	81		108.64	69		99.88	87		105.31	89		100.85	102
	5.14	66		32.35	97		4.92	104		15.69	85		9.25	86	0.0928066			88.64	89		104.52	68		108.86	85		106.91	85		108.54	86
	33.23	87		10.28	159		6.6	118		1.5	113		31.79	78	0.167783			77.2	79		105.5	98		111.48	69		118.35	81		113.36	83
	13.88	100		25.87	124		4.06	120		5.84	104		11.53	63	0.101995			86.71	75		96.9	97		102.37	72		118.2	71		99.14	78
	14.26	136		24.77	133		37.49	125		11.51	103		5.79	27	0.13491			82.25	71		110.22	107		100.43	79		112.51	73		110	97
	13.89	82		11.9	133		35.47	77		6.02	78		3.53	50				86.72	71		104.26	103		109.37	100		121.69	87		112.18	87
	2.58	94		9.86	102		10.64	83		8.46	76		4.56	20				83.69	79		100.14	85		98.11	78		121.61	78		110.26	93
	24.28	116		6.88	115		34.38	88		8.03	63		7.71	89				87.54	77		104.72	72		93.47	48		102.84	74		111.11	87
Average	11.639	101.467	0	14.1707	117.5	3.6	16.6443	95.2333	0.8	10.2713	91.9	1	10.95	78.6	0.4		Average	86.849	78.7333	7.6	107.348	85.0667	4.6	97.02	78.9333	4.4	110.361	82.5667	6.2	109.359	92.2667	0.4
Ave - Back	11.639	101.467		10.5707	113.9		15.8443	94.4333		9.27133	90.9		10.55	78.2			Ave - Back	79.249	71.1333		102.748	80.4667		92.62	74.5333		104.161	76.3667		108.959	91.8667
P/A ratio	0.114708			0.0928066			0.167783			0.101995			0.13491				P/A ratio	1.11409			1.2769			1.24267			1.36396			1.18606
Ory + DMSO (Dark)																	Ory + DMSO (wBL)
	Sample1			Sample2			Sample3			Sample4			Sample5					Sample1			Sample2			Sample3			Sample4			Sample5
	Anticlinal	Periclinal	Back ground	Anticlinal	Periclinal	Back ground	Anticlinal	Periclinal	Back ground	Anticlinal	Periclinal	Back ground	Anticlinal	Periclinal	Back ground			Anticlinal	Periclinal	Back ground	Anticlinal	Periclinal	Back ground	Anticlinal	Periclinal	Back ground	Anticlinal	Periclinal	Back ground	Anticlinal	Periclinal	Back ground
	11.76	117	0	12.63	81	1	38.19	121	0	16.57	108	0	30.43	13	1			91.29	61	6	109.5	98	0	118.23	113	5	111.55	84	1	126.14	106	2
	12.12	109	7	13.28	81	6	11.54	144	0	21.65	59	0	28.09	138	0			95.07	77	4	108.59	101	0	125.34	98	5	106.13	84	0	127.08	98	0
	25.76	115	4	7.32	52	0	10.01	127	0	26.82	101	6	11.59	128	8			96.59	76	5	109.02	88	2	121.91	86	4	108.11	91	0	112.68	97	3
	19.38	103	0	7.67	49	3	25.81	113	0	26.1	110	0	12.08	112	0			109.11	70	3	101.36	78	3	124.37	100	7	100.68	86	3	118.22	84	4
	23.06	84	0	24.14	90	0	29.47	101	0	11.54	105	0	24.31	125	3			102.3	61	4	105.77	103	3	112.89	101	5	99.69	51	0	105.83	103	3
	11.18	97		12.14	141		13.2	108		14.4	109		15.87	122				94.48	69		101.04	90		121.51	83		110.26	67		115.29	117
	29.62	136		11.32	133		11.36	107		11.58	135		13.26	138				94.56	74		100.73	104		120.17	104		108.75	85		116.13	56
	14.41	51		7.73	96		7.61	69		33.04	130		24.33	103				95.76	83		105.67	75		124.38	94		104.34	72		115.21	66
	17.53	82		10.82	109		28.64	125		5.05	145		17.9	98				95.44	74		105.69	89		122.72	107		100.31	75		112.24	107
	35.76	71		7.84	108		10.03	122		6.25	82		33.46	135				98.62	79		108.15	85		126.33	131		114.11	83		108.2	118
	24.24	85		13.47	48		23.63	108		37.32	121		6.11	135				92.52	89		110.21	107		134.01	106		104.4	70		103.58	111
	15.02	84		27.16	104		5.07	114		19.75	89		5.18	105				99.44	64		108.39	90		115.63	104		116.61	41		118.05	107
	19.94	117		8.08	108		9.97	165		12.02	79		8.23	144				89.01	86		104.46	97		130.15	99		117.05	66		131.31	97
	8.2	85		6.36	145		31.09	67		5.94	99		5.17	84				88.87	77		94.65	104		127.64	100		106.59	65		118.59	101
	43.88	78		6.23	88		41.19	119		13.66	139		12.53	128				83.48	75		103.46	82		113.03	97		101.51	81		117.56	94
	19.17	90		5.41	148		14.95	91		44.8	118		7.68	133				81.83	64		107.63	74		120.68	105		99.1	76		136.84	90
	14.36	124		10.36	151		12.28	104		25.63	138		8.16	130				90.48	77		114.38	108		108.53	97		112.69	69		116.08	65
	6.25	116		8.63	110		33.87	78		13.06	63		7.15	152				96.45	79		117.95	88		121	106		110.92	78		108.98	91
	13.55	110		8.92	94		22.46	86		35.36	108		8.85	135				97.14	68		108.99	96		106.76	95		103.5	75		120.5	137
	27.76	133		17.11	151		32.08	100		19.78	113		14.11	123				86.62	66		105.54	100		105.19	88		94.34	95		100.46	141
	10.16	100		12.65	109		13.45	131		25.56	117		14	155				98.28	61		105.86	95		118.06	79		95.41	76		111.15	96
	14.23	146		15.53	81		8.94	117		36.16	78		7.37	148				93.96	86		99.99	93		122.17	88		105.17	84		121.27	79
	12.57	108		26.32	91		7.5	125		16.67	145		23.82	124	0.142135			88.97	59		103.82	93		120.62	88		91.61	78		120.12	79
	13.32	157		14.49	75		15.03	94		11.29	127		20.69	121	0.100602			92.25	70		94.04	97		123.2	89		108.12	67		116.47	111
	10.6	146		22.17	68		41.93	99		34.54	132		14.9	151	0.168167			86.94	47		91.19	93		110.28	106		117.64	89		114.59	92
	12.63	121		4.56	114		34.24	95		12.63	135		7.82	119	0.169864			111.07	75		113.82	95		123.93	92		127.1	98		113.83	58
	17.02	145		8.74	127		4.08	117		10.26	141		16.61	126	0.0993258			90.35	70		101.34	96		120.47	111		105.66	73		116.73	63
	8.59	118		13.8	71		3.57	133		11.14	90		13.95	145				75.74	77		105.05	87		124.51	134		109.29	81		109.92	110
	14.51	113		9.31	88		8.52	104		13.95	110		6.78	75				79.16	63		105.5	113		111.74	103		105.63	87		105.42	84
	14.68	128		8.12	154		2.55	100		27.6	131		11.03	146				77.83	60		107.89	104		128.1	117		93.03	82		128.97	85
Average	17.3753	108.967	2.2	12.077	102.167	2	18.4087	109.467	0	20.004	111.9	1.2	14.382	123.033	2.4		Average	92.4537	71.2333	4.4	105.323	94.1	1.6	120.118	100.7	5.2	106.31	76.9667	0.8	116.248	94.7667	2.4
Ave - Back	15.1753	106.767		10.077	100.167		18.4087	109.467		18.804	110.7		11.982	120.633			Ave - Back	88.0537	66.8333		103.723	92.5		114.918	95.5		105.51	76.1667		113.848	92.3667
P/A ratio	0.142135			0.100602			0.168167			0.169864			0.0993258				P/A ratio	1.31751			1.12133			1.20333			1.38525			1.23257
P/A ratio (Dark)																	P/A ratio (wBL)
	Et	Lat + Et	DMSO	Ory + DMSO														Et	Lat + Et	DMSO	Ory +DMSO
Sample1	0.133987	0.0863872	0.114708	0.142135													Sample1	1.18641	0.178546	1.11409	1.31751
Sample2	0.113388	0.096626	0.0928066	0.100602													Sample2	1.1335	0.170596	1.2769	1.12133
Sample3	0.138207	0.0891212	0.167783	0.168167													Sample3	0.985418	0.18	1.24267	1.20333
Sample4	0.121257	0.0566753	0.101995	0.169864													Sample4	1.05229	0.122109	1.36396	1.38525
Sample5	0.10115	0.127009	0.13491	0.0993258													Sample5	0.999647	0.136947	1.18606	1.23257
Average	0.121598	0.0911638	0.122441	0.136019													Average	1.07145	0.15764	1.23674	1.252
StdDv	0.0151246	0.0251554	0.0298641	0.0347028													StdDv	0.0865883	0.0264364	0.0941329	0.10231

## Sheet: Figure5f
Et (wBL)																	Et (sBL)
	Sample1			Sample2			Sample3			Sample4			Sample5					Sample1			Sample2			Sample3			Sample4			Sample5
	Anticlinal	Periclinal	Back ground	Anticlinal	Periclinal	Back ground	Anticlinal	Periclinal	Back ground	Anticlinal	Periclinal	Back ground	Anticlinal	Periclinal	Back ground			Anticlinal	Periclinal	Back ground	Anticlinal	Periclinal	Back ground	Anticlinal	Periclinal	Back ground	Anticlinal	Periclinal	Back ground	Anticlinal	Periclinal	Back ground
	115.25	73	0	107.36	88	0	150.91	123	0	95.64	68	0	126.1	87	0			47.18	82	3	23.02	58	7	13.84	56	0	55.77	88	2	14.92	51	1
	97.72	53	0	105.81	77	0	145.68	116	0	88.22	71	0	127.14	100	0			49.29	85	1	17.25	58	2	38.71	36	1	59.18	96	0	36.77	85	0
	91.55	70	0	129.21	67	0	147.66	107	0	89.2	89	0	120.16	100	0			37.16	91	3	30.72	48	2	34.29	59	0	31.08	94	0	17.89	78	3
	91.04	51	0	117.58	98	0	135.44	134	0	89.79	68	0	124.68	114	0			39.59	93	3	37.75	69	6	39.42	52	0	31.75	67	3	17.77	67	2
	115.61	46	0	105.84	79	0	156.58	139	0	95.66	68	0	118	102	0			33.5	87	1	37.77	76	6	24.34	57	0	28.9	85	0	16.1	65	0
	108.87	60		103.28	92		148.12	148		92.7	101		127.18	99				32.19	86		37.25	71		37.68	51		14.8	88		38.2	68
	101.01	46		128.94	95		138.66	134		92.67	86		133.83	115				51.23	82		39.38	66		16.16	52		32.1	92		29.92	69
	108.13	46		113.46	75		139.34	95		96.94	81		129.03	120				28.21	82		19.36	84		17.19	59		28.04	86		34.33	68
	86.25	62		120.24	98		138.22	118		103.2	61		125.93	107				44.82	81		44.12	77		16.77	48		31.54	76		32.89	50
	101.29	54		91.68	92		136.96	87		101.62	93		106.58	110				39.4	77		22.97	58		37	54		27.18	89		31.56	60
	106.47	81		94.21	102		123.06	110		94.22	97		110.92	117				51.9	88		26.65	62		31.16	51		21.88	92		12.43	70
	118.34	82		117.74	76		130.86	133		84.29	95		111.34	107				49.99	86		22.17	64		17.6	70		13.68	72		33.52	72
	90.77	46		109.18	81		128.13	111		111.82	78		112.56	119				42.39	97		36.19	65		7.79	57		15.07	60		28.62	67
	91.46	85		121.56	92		122.28	120		93.95	91		123.71	120				36.8	79		33.56	54		9.22	54		34.35	67		22.23	69
	99.67	79		111.12	112		130.49	93		63.77	105		126.18	107				41.48	70		35.35	71		14.61	53		35.92	78		37.86	62
	97.75	67		141.19	124		156.17	99		101.61	89		112.75	92				26.92	68		36.76	58		14.54	71		25.71	74		28.75	53
	93.62	60		124.52	112		125.84	81		97.43	74		122.81	114				40.07	68		27.42	61		29.71	57		18.68	70		26.33	69
	117.9	34		135.85	124		119.73	89		105.94	92		134.12	121				54.74	71		18.42	63		3.3	66		13.84	64		21.8	64
	105.34	64		131.62	110		135.62	111		102.12	111		133.73	123				41.64	73		18.98	61		9.34	70		27.33	90		37.47	65
	98.9	32		104.86	83		157.95	126		101.58	94		131.12	136				40.68	72		23.68	55		24.94	68		16.94	92		38.32	98
	89.83	77		113.34	100		126.15	91		94.27	110		116.14	111				46.02	81		26.89	88		9.46	63		26.17	69		32.95	66
	98.63	72		144.57	113		121.99	99		111.66	111		112.54	106				45.5	72		21.4	54		15.81	59		19.07	67		26.44	65
	90.37	97		110.65	88		127.39	63		99.49	117		118.89	127	1.58106			50.87	92		13.88	79		14.41	73		9.2	78		17.18	57	0.487826
	97.08	51		99.55	110		144.09	105		84.87	48		131.3	110	1.17258			42.21	89		10.65	64		12.57	80		9.9	74		33.99	75	0.362457
	100.72	90		113.5	114		134.88	99		108.05	115		129.69	97	1.25381			34.88	65		23.67	74		12.22	64		16.35	70		30.2	73	0.315696
	98.72	87		120.46	126		135.3	96		93.13	94		117.94	120	1.07133			36.03	78		18.9	72		6.34	71		18.04	71		22.6	80	0.310176
	107.05	52		119.87	127		117	112		77.62	95		125.74	104	1.11262			40.84	76		19.76	64		22.65	71		24.15	77		35.01	67	0.400383
	105.13	48		108.85	100		106.65	123		93.82	102		117.99	107				29.69	82		27.48	75		20.34	55		33.07	84		24.21	57
	101.4	65		129.28	117		139.63	63		103.61	102		128.29	98				30.03	72		24.03	56		8.96	60		22.13	68		30.4	73
	105.03	87		131.88	119		113.98	93		107.64	79		121.93	116				27.14	91		20.43	48		8.2	51		9.65	78		20.1	58
Average	101.03	63.9	0	116.907	99.7	0	134.492	107.267	0	95.8843	89.5	0	122.611	110.2	0		Average	40.413	80.5333	2.2	26.5287	65.1	4.6	18.9523	59.6	0.2	25.049	78.5333	1	27.692	67.3667	1.2
Ave - Back	101.03	63.9		116.907	99.7		134.492	107.267		95.8843	89.5		122.611	110.2			Ave - Back	38.213	78.3333		21.9287	60.5		18.7523	59.4		24.049	77.5333		26.492	66.1667
P/A ratio	1.58106			1.17258			1.25381			1.07133			1.11262				P/A ratio	0.487826			0.362457			0.315696			0.310176			0.400383
Lat + Et (wBL)																	Lat + Et (sBL)
	Sample1			Sample2			Sample3			Sample4			Sample5					Sample1			Sample2			Sample3			Sample4			Sample5
	Anticlinal	Periclinal	Back ground	Anticlinal	Periclinal	Back ground	Anticlinal	Periclinal	Back ground	Anticlinal	Periclinal	Back ground	Anticlinal	Periclinal	Back ground			Anticlinal	Periclinal	Back ground	Anticlinal	Periclinal	Back ground	Anticlinal	Periclinal	Back ground	Anticlinal	Periclinal	Back ground	Anticlinal	Periclinal	Back ground
	172.83	160	0	144.82	108	0	187.66	129	0	143.32	113	0	145.76	129	0			70.52	83	2	85.76	75	4	83.04	82	0	87.53	89	0	37.76	61	5
	165.72	162	0	148.33	127	0	167.83	130	0	124.86	100	0	132.14	110	0			94.7	100	0	78.93	88	1	93.61	96	0	68.61	59	0	55.22	78	1
	174.15	145	0	138.48	112	0	166.04	150	0	134.21	129	0	156.68	110	0			97.45	70	1	74.14	74	0	99.4	89	0	66.87	66	0	62.31	84	0
	194.4	153	0	119.28	118	0	158.98	125	0	116.77	95	0	124.49	105	0			85.72	82	2	75.75	70	2	68.85	76	2	85.74	68	0	24.64	42	0
	180.6	160	0	143.64	145	0	182.83	128	0	126.05	119	0	112.68	108	0			82.9	70	1	71.01	69	3	104.2	87	2	87.32	55	0	91.54	44	4
	175.19	154		149.28	127		145.74	114		115.66	123		124.41	122				87.58	89		93.7	91		92.09	57		82.26	59		96.68	58
	160.26	187		145.87	145		151.62	166		111.59	140		92.88	116				81.56	80		58.15	91		86.91	70		62.88	54		95.75	73
	149.66	172		143.98	127		162.4	166		115.02	124		113.8	133				86.8	57		101.26	91		76.28	69		79.09	52		88.24	70
	166.53	189		147.32	125		163.76	144		121.51	109		149.48	136				98.32	73		108.05	91		93.65	90		69.97	72		47.39	98
	176.34	189		141.25	140		158.51	104		134.28	96		141.85	114				93.77	77		73.4	79		105.63	94		26.43	48		34.89	48
	168.43	149		138.14	119		157.35	122		118.08	116		143.96	118				85.99	66		112.27	66		95.45	101		40.3	66		74.18	57
	183.69	168		133.01	122		167.9	141		133.97	100		134.44	135				82.67	82		88.37	92		97.99	84		43.53	90		62.83	53
	164.51	157		134.95	96		177.52	136		130.25	98		132.21	114				94.31	93		117.07	74		117.09	81		16.37	72		56.34	54
	179.74	138		145.27	112		184.11	123		118.93	105		144.08	133				84.24	90		59.77	95		109.07	105		26.18	57		78.93	70
	187.52	134		154.96	151		161.96	121		142.68	132		89.2	126				81.24	69		102.68	72		96.68	107		69.65	56		41.02	89
	160.64	179		157.04	112		153.85	162		143.08	103		122.8	130				82.1	87		110.08	83		106.11	87		43.13	60		21.41	49
	157.12	178		157.79	113		146.75	127		112.73	115		124.91	100				89.64	81		100.41	73		93.19	79		67.34	86		49.73	84
	156.08	143		150.89	137		173.13	129		107.3	122		128	107				92.52	86		108.33	56		93.51	97		73.62	78		48.25	64
	155.98	146		149.15	143		186.27	132		123.69	109		140.75	117				91.8	92		97.78	67		89.45	106		70.46	48		64.04	95
	152.45	159		148.61	86		153.09	158		114.89	104		147.56	134				80.86	87		97.42	95		81.87	93		63.07	64		55.89	56
	163.14	143		146.82	109		169.71	176		116.89	125		139.65	105				92.42	69		91.93	93		91.82	89		90.39	44		70.22	55
	151.05	164		137.26	137		157.65	162		136.94	116		100.47	107				87.07	96		97.56	71		106.2	95		78.85	77		70.8	75
	175.62	137		130.27	108		176.29	133		145.13	130		113.23	112	1.08099			74.57	93		79.38	76		82.89	69		70.08	41		60.89	62	1.08674
	173.7	125		133.51	148		166.46	132		138.23	125		125.32	130	1.10994			93.52	67		74	79		87.35	74		81.49	53		57.62	88	1.14927
	168.58	107		130.18	134		189.88	123		140.52	127		146.87	122	1.2204			88.3	83		69.43	62		98.25	78		100.6	64		47.55	73	1.0981
	177.81	179		106.77	121		179.68	147		142.35	110		146.24	134	1.11531			89.21	70		93.59	94		88.88	94		101.61	37		61.94	62	1.07487
	154.9	128		133.54	142		193.51	158		129.82	118		157.87	128	1.09872			85.85	78		87.84	76		104.79	94		73.08	63		52.38	73	0.8898
	172.89	144		124.67	123		184.54	129		138.82	103		148.57	136				79.88	85		81.3	71		100.38	64		74.99	80		57.56	66
	157.58	148		105.82	130		177.1	145		135.91	113		141.95	119				98.57	69		117.39	74		100.71	94		84.68	62		88.78	67
	171.12	173		103.63	117		164.99	140		123.19	121		157.33	132				86.18	90		98.86	74		97.49	90		55.05	79		39.44	61
Average	168.274	155.667	0	138.151	124.467	0	168.904	138.4	0	127.889	114.667	0	132.653	120.733	0		Average	87.342	80.4667	1.2	90.187	78.7333	2	94.761	86.3667	0.8	68.039	63.3	0	59.8073	66.9667	2
Ave - Back	168.274	155.667		138.151	124.467		168.904	138.4		127.889	114.667		132.653	120.733			Ave - Back	86.142	79.2667		88.187	76.7333		93.961	85.5667		68.039	63.3		57.8073	64.9667
P/A ratio	1.08099			1.10994			1.2204			1.11531			1.09872				P/A ratio	1.08674			1.14927			1.0981			1.07487			0.8898
DMSO (wBL)																	DMSO (sBL)
	Sample1			Sample2			Sample3			Sample4			Sample5					Sample1			Sample2			Sample3			Sample4			Sample5
	Anticlinal	Periclinal	Back ground	Anticlinal	Periclinal	Back ground	Anticlinal	Periclinal	Back ground	Anticlinal	Periclinal	Back ground	Anticlinal	Periclinal	Back ground			Anticlinal	Periclinal	Back ground	Anticlinal	Periclinal	Back ground	Anticlinal	Periclinal	Back ground	Anticlinal	Periclinal	Back ground	Anticlinal	Periclinal	Back ground
	90.06	73	0	164.04	166	0	117.46	121	0	120.24	102	0	130.69	110	0			43.81	81	1	39.01	74	0	39.95	102	2	56.08	97	1	78.03	78	2
	98.84	77	0	149.73	121	0	125.21	85	0	105.73	88	0	100.12	83	0			85.41	95	3	28.54	74	0	46.49	79	1	95.45	97	3	32.34	66	0
	97.43	56	0	158.7	141	0	113.25	81	0	139	57	0	125.61	77	0			64.37	86	7	31.63	74	1	36.71	76	0	67.44	89	2	51.33	82	2
	102.61	34	0	142.82	122	0	132.08	88	0	137.66	117	0	87.43	79	0			47.52	80	0	39.62	75	2	24.54	64	1	78.88	93	3	58.11	84	4
	91.97	71	0	132.55	112	0	130.57	75	0	133.52	79	0	94.8	46	0			60.17	88	0	26.94	71	2	42.65	84	5	50.4	73	1	90.03	79	1
	82.37	53		144.7	130		115.82	59		142.67	123		86.95	57				39.55	74		33.09	65		50.18	97		55.55	72		60.56	63
	92.94	85		130.89	102		125.36	53		158.28	92		84.68	76				53.89	78		47.04	72		34.05	99		54.14	88		58.63	83
	81.93	89		123.91	127		119.56	95		177.21	133		105.82	59				37.67	73		40.99	80		34.64	83		72.69	89		35.15	92
	80.23	82		127.02	123		112	102		141.88	95		96.43	77				42.83	68		39.46	69		45.39	100		76.65	77		60.23	85
	72.6	65		132.24	120		129.59	105		146.59	106		64.87	87				42.28	90		39.25	56		41.96	86		60.5	74		67.25	80
	76.48	55		136.97	111		141.32	96		165.13	111		69.49	102				36.56	110		23.51	67		49.39	82		60.8	81		48.89	78
	74.88	82		142.38	130		129.11	68		145.05	79		79.95	67				46.87	90		34.18	67		46.51	100		44.9	75		66.08	99
	78.15	68		155.85	128		113.27	83		139.43	89		74.45	81				36.86	86		34.75	80		63.56	101		59	62		52.2	74
	57.42	67		132.56	109		120.55	114		133.54	50		70.67	92				64.06	77		39.89	77		43.16	92		32.38	73		44.99	85
	83.23	82		149.45	145		99.69	83		155.14	98		95.65	78				35.99	90		38.72	66		47.28	75		59.52	90		44.77	77
	90.96	58		138.6	85		80.89	97		150.46	98		86.2	97				28.89	82		37.94	76		40.87	92		40.12	98		54.94	70
	97.4	79		158.04	93		112.48	104		143.07	98		75.31	93				30.43	71		37.76	80		51.08	98		29.82	99		49.83	56
	88.42	60		164.14	99		95.58	112		155.6	98		98	102				24.21	72		58.47	85		36.97	72		59.85	94		47.64	84
	96.35	73		155.88	97		122.73	89		144.1	98		82.04	85				18	89		30.93	69		43.87	78		63.61	80		37.69	74
	97.5	82		149.57	133		126.44	96		122.91	117		68.56	66				16.29	82		38.89	72		48.18	87		59.27	84		37.47	61
	83.93	66		146.68	97		118.31	88		135.23	126		110.26	72				29.11	92		32.14	87		40.75	70		48.01	82		44.28	65
	84.24	60		131.72	87		117.51	85		157.11	102		103.47	65				37.49	100		35.62	97		44.68	91		60.88	105		46.78	88
	66.02	82		148.84	98		103.42	116		128.49	105		91.96	55	1.25089			36.04	85		44.49	77		47.81	97		48.41	93		48.08	91	0.475439
	79.18	71		126.93	132		101.03	109		78.28	92		91.27	23	1.2411			27.6	84		42.06	42		40.57	81		53.16	66		56.39	82	0.519782
	82.97	68		132.75	97		102.64	124		113.09	102		103.78	75	1.26766			27.52	62		47.83	82		31.22	87		59.38	92		42.4	88	0.497721
	85.38	76		168.1	111		113.96	102		102.28	70		91.79	78	1.3744			28.77	62		42.07	62		50.41	72		48.73	80		53.4	84	0.664082
	90.41	70		151.78	128		111.56	88		112.05	117		87.62	54	1.2379			40.31	91		60.59	73		52.54	84		46.18	70		56.4	81	0.674547
	74.09	63		154.18	119		123.38	61		121.33	117		87.93	49				44.24	82		37.45	77		60.54	73		49.18	88		50.81	77
	96.14	40		152.78	144		128.2	82		139.73	119		98.51	47				52.72	81		39	69		38.47	71		52.11	88		54.74	62
	80.18	55		159.92	109		114.5	98		109.69	72		108.77	92				39.48	90		29.83	73		26.37	86		63.17	90		74.67	84
Average	85.1437	68.0667	0	145.457	117.2	0	116.582	91.9667	0	135.15	98.3333	0	91.7693	74.1333	0		Average	40.6313	83.0333	2.2	38.3897	72.9333	1	43.3597	85.3	1.8	56.8753	84.6333	2	53.4703	78.4	1.8
Ave - Back	85.1437	68.0667		145.457	117.2		116.582	91.9667		135.15	98.3333		91.7693	74.1333			Ave - Back	38.4313	80.8333		37.3897	71.9333		41.5597	83.5		54.8753	82.6333		51.6703	76.6
P/A ratio	1.25089			1.2411			1.26766			1.3744			1.2379				P/A ratio	0.475439			0.519782			0.497721			0.664082			0.674547
Ory + DMSO (wBL)																	Ory + DMSO (sBL)
	Sample1			Sample2			Sample3			Sample4			Sample5					Sample1			Sample2			Sample3			Sample4			Sample5
	Anticlinal	Periclinal	Back ground	Anticlinal	Periclinal	Back ground	Anticlinal	Periclinal	Back ground	Anticlinal	Periclinal	Back ground	Anticlinal	Periclinal	Back ground			Anticlinal	Periclinal	Back ground	Anticlinal	Periclinal	Back ground	Anticlinal	Periclinal	Back ground	Anticlinal	Periclinal	Back ground	Anticlinal	Periclinal	Back ground
	139.23	123	0	166.46	129	0	161.87	101	0	135.81	108	0	141.71	116	0			38.83	56	0	28.43	64	1	67.28	66	0	15.16	50	1	56.73	65	2
	123.61	121	0	116.44	118	0	164.12	68	0	114.75	102	0	145.11	125	0			38.41	67	2	16.54	71	1	59.95	89	0	34.61	71	0	56.31	56	1
	135.94	139	0	146.18	98	0	161.87	134	0	123.38	139	0	125.76	117	0			33.43	68	0	28.18	71	0	50.77	82	2	41.79	73	0	50.85	52	1
	119.48	107	0	159.86	118	0	165.12	98	0	122.26	137	0	150.92	126	0			24.05	69	0	12.5	85	0	62.64	62	1	60.82	71	0	36	68	1
	120.03	123	0	131.88	122	0	146.56	122	0	141.06	125	0	130.53	96	0			33.51	62	0	34.22	59	0	47.31	72	3	26.51	68	0	49.66	69	1
	132.96	95		155.05	113		160.84	107		143.66	128		126.89	114				36.86	85		29.25	72		46.44	102		30.91	59		60.36	92
	151.02	132		153.14	138		137.76	142		142.12	119		107.17	111				29.23	73		48.87	61		62.65	45		30.72	65		50.12	66
	147.49	114		169.18	132		146.55	131		135.17	109		133.02	127				41.68	74		26.21	68		91.7	69		22.71	59		41.65	73
	124.02	127		151.19	131		131.74	115		146.15	141		132.37	95				12.07	74		43.95	70		46.58	67		34.14	85		36.45	89
	126.53	86		143.58	128		113.83	95		150.49	160		131.04	117				47.51	66		39.02	45		56.74	81		21.96	69		29.59	51
	123.57	116		149.04	123		128.32	148		155.3	160		132.7	98				38.26	85		28.56	48		66.25	56		30.24	73		26.73	66
	114.92	116		148.85	110		142.13	108		141.18	132		136.85	129				30.99	54		49.55	61		60.66	70		27.62	69		37	79
	115.88	128		155.45	134		148.52	132		142.13	120		140.31	114				21.36	31		36.01	76		50.25	55		16.36	69		42.83	57
	133.81	90		151.53	145		136.4	122		159.33	120		137.67	88				15.42	58		35.89	70		30.8	88		41.87	56		37.16	61
	144.59	122		138.99	123		143.43	92		158.77	141		147.98	124				57.77	84		26.1	63		24.51	88		38.1	69		41.43	79
	132.05	131		145.98	109		153.73	105		145.55	145		147.02	110				34.42	37		34.5	50		46.81	94		22.94	77		27.66	71
	115.64	130		135.6	127		146.1	122		151.33	149		147.41	129				37.75	61		16.56	81		42.1	82		49.2	63		26.67	93
	116.52	120		143.47	144		160.01	108		145.87	153		144.83	121				16.44	59		18.17	78		36.09	68		22.67	87		36.62	86
	141.58	105		158.11	119		151.05	119		155.56	133		127.8	133				12.18	53		36.8	129		50.72	78		21.27	89		43.01	88
	130.26	127		161.97	107		141.32	119		149.57	140		156.77	137				14.66	52		36.15	125		39.52	50		24.49	69		35.89	87
	150.65	145		155.86	144		153.14	104		157.87	165		136.37	136				22.5	44		41.08	81		47.28	92		21.58	68		47.01	93
	141.1	112		177.77	132		142.66	87		123.55	119		141.93	114				28.44	48		26.11	84		54.7	96		20.58	78		34.62	73
	161.13	107		159.42	131		124.47	135		137.66	129		146.9	155	1.15536			16.38	54		36.12	82		69.6	74		29.45	66		38.46	77
	154.99	98		145.18	131		151.95	105		116.09	117		154.14	144	1.18344			13.47	63		29.43	56		30.66	87		40.12	89		32.52	76	0.443291
	147.12	122		124.61	107		137.07	100		120.54	122		128.37	121	1.29336			26.36	58		18.58	36		39.59	100		35.63	60		31.64	69	0.455908
	131.28	109		140.07	137		143	117		120.13	124		131.05	110	1.05515			32.5	81		42.65	79		35.4	76		31.59	65		31.06	82	0.622726
	133.72	119		128.78	121		143.45	119		128.03	114		134.6	108	1.14871			13.39	78		55.94	65		38.01	82		14.85	48		49.78	79	0.437882
	137.68	122		138.49	109		137.8	130		115.91	114		133.46	137				20.79	68		31.6	53		31.77	80		21.56	53		41.69	80	0.547648
	154.24	111		141.03	115		155.63	95		125.32	125		117.07	120				41.23	63		35.43	51		24.34	56		26.83	63		61.66	69
	149.64	109		136.45	148		146.3	104		112.66	112		145.79	109				10.62	56		23.36	70		34.11	92		44.75	69		46.38	84
Average	135.023	116.867	0	147.654	124.767	0	145.891	112.8	0	137.24	130.067	0	137.118	119.367	0		Average	28.017	62.7	0.4	32.192	70.1333	0.4	48.1743	76.6333	1.2	30.0343	68.3333	0.2	41.2513	74.3333	1.2
Ave - Back	135.023	116.867		147.654	124.767		145.891	112.8		137.24	130.067		137.118	119.367			Ave - Back	27.617	62.3		31.792	69.7333		46.9743	75.4333		29.8343	68.1333		40.0513	73.1333
P/A ratio	1.15536			1.18344			1.29336			1.05515			1.14871				P/A ratio	0.443291			0.455908			0.622726			0.437882			0.547648
P/A ratio (wBL)																	P/A ratio (sBL)
	Et	Lat + Et	DMSO	Ory + DMSO														Et	Lat + Et	DMSO	Ory + DMSO
Sample1	1.58106	1.08099	1.25089	1.15536													Sample1	0.487826	1.08674	0.475439	0.443291
Sample2	1.17258	1.10994	1.2411	1.18344													Sample2	0.362457	1.14927	0.519782	0.455908
Sample3	1.25381	1.2204	1.26766	1.29336													Sample3	0.315696	1.0981	0.497721	0.622726
Sample4	1.07133	1.11531	1.3744	1.05515													Sample4	0.310176	1.07487	0.664082	0.437882
Sample5	1.11262	1.09872	1.2379	1.14871													Sample5	0.400383	0.8898	0.674547	0.547648
Average	1.23828	1.12507	1.27439	1.1672													Average	0.375308	1.05975	0.566314	0.501491
StdDv	0.203543	0.0548846	0.0570969	0.085466													StdDv	0.0728866	0.0991512	0.095396	0.0811476
